# Supplementary material
Source: publisher figshare collection journal article supplement (https://geolsoc.figshare.com/ndownloader/files/27339956)
Supplement: Supplementary file 1 [file 27339956]

## Sheet: Sheet1
			Isotope ratios											Age estimates (ma)								Concentrations
			Concordia output						Terra-Wasserburg output
Analysis_#	Comment1	Comment 2	Pb207 U235	1s%	Pb206 U238	1s%	roh		238/206	1s%	207/206	1s%		Pb207 Pb206	1s	Pb207 U235	1s	Pb206 U238	1s	conc		Th/U	U*	Th*
130337_01	Wtd. avg	Altered, heterogenous grain	0.65315	1.15441	0.08119	1.04693	0.475298		12.3168	1.04693	0.05834	1.1313		542.7	24.46	510.4	4.63	503.2	5.05	92.7216		0.596446	957.514	571.105
130337_02	Wtd. avg	Altered, heterogenous grain	0.62027	1.1237	0.0783	1.04725	0.491547		12.7714	1.04725	0.05745	1.09661		508.6	23.83	490	4.37	485.9	4.88	95.5368		0.58603	967.769	567.142
130337_03	Young, disc. outlier	Altered, heterogenous grain	0.57682	1.21182	0.07285	1.04324	0.456562		13.7268	1.04324	0.05742	1.18426		507.4	25.87	462.4	4.5	453.3	4.59	89.3378		0.42159	908.789	383.136
130337_04	Wtd. avg	Altered, heterogenous grain	0.64113	1.10274	0.08024	1.0344	0.500126		12.4626	1.0344	0.05794	1.07007		527.3	23.66	503	4.38	497.6	4.98	94.3675		0.598142	1107.79	662.616
130337_05	Wtd. avg	Altered, heterogenous grain	0.65077	1.11253	0.08013	1.03582	0.490276		12.4797	1.03582	0.0589	1.08659		563.4	23.41	509	4.45	496.9	4.98	88.1967		0.614399	1032.34	634.269
130337_06	Wtd. avg	Altered, heterogenous grain	0.62345	1.10835	0.07784	1.0406	0.491909		12.8469	1.0406	0.05808	1.08471		532.5	23.9	492	4.32	483.2	4.85	90.7418		0.443381	872.1	386.673
130337_07	Wtd. avg	Altered, heterogenous grain	0.60623	1.11179	0.07743	1.04611	0.505673		12.9149	1.04611	0.05678	1.07432		482.3	23.94	481.2	4.26	480.8	4.82	99.689		0.551444	1135.95	626.414
130342_01	Conc. age	Osc./sector zoned grain	0.55281	1.23008	0.07225	1.0519	0.448914		13.8408	1.0519	0.05549	1.20742		431.6	26.61	446.8	4.45	449.7	4.56	104.194		0.59625	240.937	143.658
130342_02	Conc. age	Osc./sector zoned grain	0.53561	1.2173	0.06983	1.0454	0.458567		14.3205	1.0454	0.05563	1.18641		437.2	25.89	435.5	4.31	435.1	4.41	99.5197		0.265759	258.806	68.7801
130342_03	Conc. age	Osc./sector zoned grain	0.55347	1.25571	0.0717	1.04603	0.438416		13.947	1.04603	0.05598	1.23258		451.3	26.83	447.3	4.55	446.4	4.54	98.9142		0.448539	206.395	92.5764
130342_04	Conc. age	Osc./sector zoned grain	0.55921	1.43595	0.07176	1.07302	0.376028		13.9353	1.07302	0.05651	1.43337		471.8	31.5	451	5.23	446.8	4.6	94.7011		0.33021	103.579	34.2028
130342_05	Conc. age	Osc./sector zoned grain	0.56293	1.29501	0.0724	1.04972	0.4225		13.8122	1.04972	0.05639	1.27682		466.9	28.18	453.4	4.73	450.6	4.59	96.5089		0.582143	168.277	97.9613
130342_06	Conc. age	Osc./sector zoned grain	0.58356	1.23209	0.07172	1.04573	0.451691		13.9431	1.04573	0.05901	1.20319		567.3	26.31	466.7	4.61	446.5	4.54	78.7062		0.507163	230.403	116.852
130342_07	Conc. age	Osc./sector zoned grain	0.54817	1.35542	0.07175	1.05923	0.409408		13.9373	1.05923	0.05541	1.3355		428.4	29.49	443.8	4.87	446.7	4.57	104.272		0.569243	138.491	78.8351
130342_08	Conc. age	Osc./sector zoned grain	0.54747	1.18363	0.0711	1.04079	0.458324		14.0647	1.04079	0.05584	1.16404		445.6	25.08	443.3	4.25	442.8	4.48	99.3716		0.535109	355.279	190.113
130350_01	Conc. age	Osc.zoned, prismatic grain	0.53254	1.26939	0.0697	1.04735	0.435356		14.3472	1.04735	0.05541	1.24526		428.6	27.62	433.5	4.48	434.3	4.4	101.33		0.545081	188.102	102.531
130350_02	Conc. age	Osc.zoned, prismatic grain	0.54241	1.32372	0.07067	1.04712	0.40733		14.1503	1.04712	0.05567	1.3113		438.8	28.46	440	4.73	440.2	4.48	100.319		0.407675	145.127	59.1646
130350_03	Metamorphic	Osc.zoned, prismatic grain	0.52773	1.26769	0.06876	1.04712	0.422569		14.5433	1.04712	0.05566	1.25764		438.5	27.14	430.3	4.44	428.7	4.35	97.7651		0.109047	548.988	59.8654
130350_04	Conc. age	Osc.zoned, prismatic grain	0.55983	1.26646	0.07022	1.05383	0.436015		14.241	1.05383	0.05782	1.24524		522.8	27.4	451.4	4.61	437.5	4.44	83.684		0.686405	180.037	123.579
130350_05	Discordant	Osc.zoned, prismatic grain	0.67454	1.14893	0.0701	1.04137	0.46936		14.2653	1.04137	0.06979	1.13197		922.1	22.96	523.5	4.7	436.8	4.4	47.3701		0.931505	530.843	494.483
130350_06	Inherited	Osc.zoned core	2.05918	1.09267	0.19285	1.03708	0.506633		5.18538	1.03708	0.07744	1.05888		1132.5	21.05	1135.3	7.47	1136.8	10.81	100.38		0.379257	323.214	122.581
130350_07	Conc. age	Osc.zoned, prismatic grain	0.54873	1.17726	0.072	1.04167	0.460797		13.8889	1.04167	0.05527	1.15795		423	25.44	444.2	4.24	448.2	4.51	105.957		0.0848837	342.63	29.0837
130350_08	Discordant	Osc.zoned, prismatic grain	0.85404	1.26107	0.0756	1.0582	0.434542		13.2275	1.0582	0.08192	1.24512		1243.7	24.26	626.9	5.9	469.8	4.78	37.7744		2.59396	128.621	333.639
130350_09	Conc. age	Osc.zoned, prismatic grain	0.54881	1.33015	0.07065	1.04742	0.409342		14.1543	1.04742	0.05633	1.31369		464.8	29.08	444.2	4.78	440.1	4.48	94.6859		1.52449	145.03	221.097
130350_10	Conc. age	Osc.zoned, prismatic grain	0.55593	1.34549	0.0732	1.05191	0.409913		13.6612	1.05191	0.05508	1.32534		415.2	29.3	448.9	4.88	455.4	4.64	109.682		2.16843	142.585	309.185
130350_11	Conc. age	Osc.zoned, prismatic grain	0.55842	1.33591	0.07031	1.05248	0.409469		14.2227	1.05248	0.0576	1.31944		514.2	29.12	450.5	4.86	438	4.47	85.1809		1.44536	139.685	201.895
130350_12	Conc. age	Osc.zoned, prismatic grain	0.56806	1.28332	0.07319	1.05206	0.430621		13.6631	1.05206	0.05629	1.26133		463.1	28.01	456.8	4.72	455.3	4.62	98.3157		0.822283	218.123	179.359
130350_13	Conc. age	Osc.zoned, prismatic grain	0.54311	1.31833	0.07096	1.05693	0.420821		14.0924	1.05693	0.05551	1.29706		432.4	28.32	440.5	4.71	441.9	4.5	102.197		1.09236	178.13	194.583
130350_14	Conc. age	Osc.zoned, prismatic grain	0.54282	1.38536	0.07106	1.05545	0.393673		14.0726	1.05545	0.0554	1.37184		428.1	30.28	440.3	4.95	442.5	4.53	103.364		2.04237	123.232	251.686
130350_15	Conc. age	Osc.zoned, prismatic grain	0.54188	1.23828	0.07159	1.04763	0.439754		13.9684	1.04763	0.05489	1.22062		407.8	26.79	439.7	4.42	445.7	4.51	109.294		0.13111	224.596	29.4469
130350_16	Conc. age	Osc.zoned, prismatic grain	0.56298	1.35706	0.07236	1.0503	0.396711		13.8198	1.0503	0.05643	1.3468		468.4	29.69	453.5	4.96	450.3	4.6	96.1358		0.357279	132.774	47.4374
